# Supplementary material for: Statistical Integration of ‘Omics Data Increases Biological Knowledge Extracted from Metabolomics Data: Application to Intestinal Exposure to the Mycotoxin Deoxynivalenol
Source: MDPI journal article supplement (doi:10.3390/metabo11060407), 2021-06-21
Supplement: s1 [file s1]

# Statistical Integration of 'Omics Data Increases Biological Knowledge Extracted from Metabolomics Data: Application to Intestinal Exposure to the Mycotoxin Deoxynivalenol

Marie Tremblay Franco <sup>1,2,\*</sup>, Cécile Canlet <sup>1,2</sup>, Philippe Pinton <sup>1</sup>, Yannick Lippi <sup>1</sup>, Roselyne Gautier <sup>1,2</sup>, Claire Naylies <sup>1</sup>, Manon Neves <sup>1</sup>, Isabelle P. Oswald <sup>1</sup>, Laurent Debrauwer <sup>1,2</sup> and Imourana Alassane-Kpembé <sup>3</sup>

<sup>1</sup> Toxalim (Research Center in Food Toxicology), Toulouse University, INRAE, ENVT, INP-Purpan, UPS, F-31027 Toulouse, France; cecile.canlet@inrae.fr (C.C.); philippe.pinton@inrae.fr (P.P.); yannick.lippi@inrae.fr (Y.L.); roselyne.gautier@inrae.fr (R.G.); claire.naylies@inrae.fr (C.N.); manon.neves@inrae.fr (M.N.); isabelle.oswald@inrae.fr (I.P.O.); laurent.debrauwer@inrae.fr (L.D.)

<sup>2</sup> Metatoul-AXIOM Platform, MetaboHUB, Toxalim, INRAE, F-31027 Toulouse, France

<sup>3</sup> Department of Veterinary Biomedicine, Faculty of Veterinary Medicine, Université de Montréal, Saint-Hyacinthe, QC J2S 2M2, Canada; imourana.alassane-kpembé@umontreal.ca

\* Correspondence: marie.tremblay-franco@inrae.fr

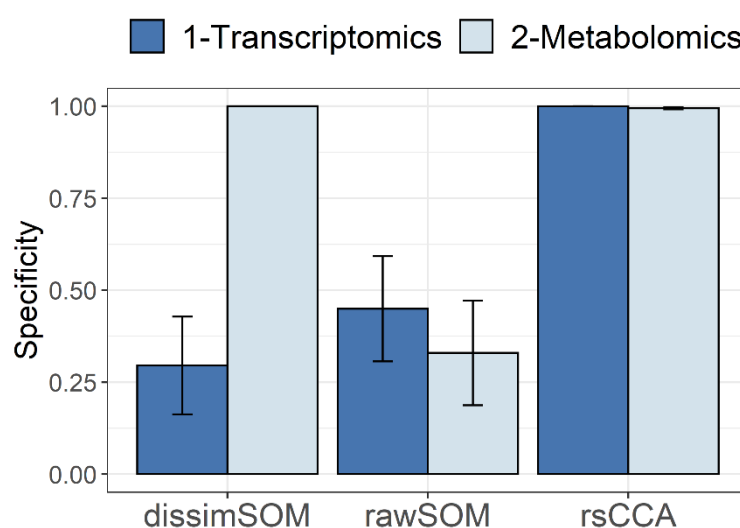

**Figure S1.** Average specificity of SOM (dissimilarity kernel-based and raw) and Robust Sparse CCA methods calculated for transcriptomic (middle blue bars) and metabolomic (light blue bars) blocks. One hundred Monte Carlo simulations.

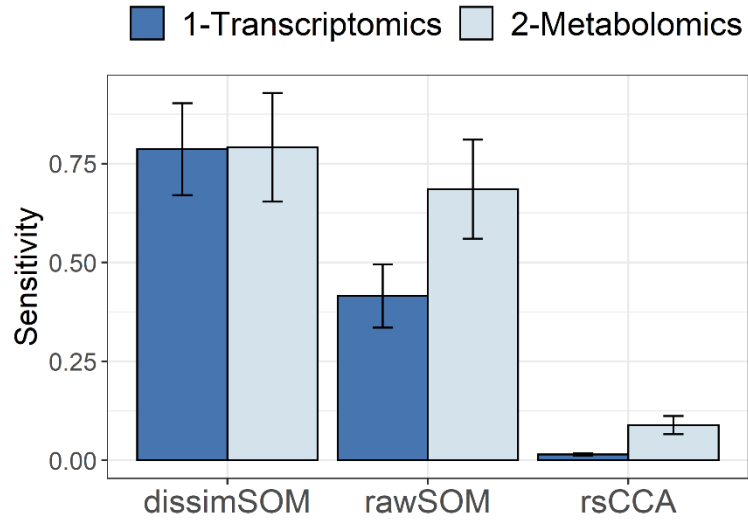

**Figure S2.** Average sensitivity of SOM (dissimilarity kernel-based and raw) and Robust Sparse CCA methods calculated for transcriptomic (middle blue bars) and metabolomic (light blue bars) blocks. One hundred Monte Carlo simulations.

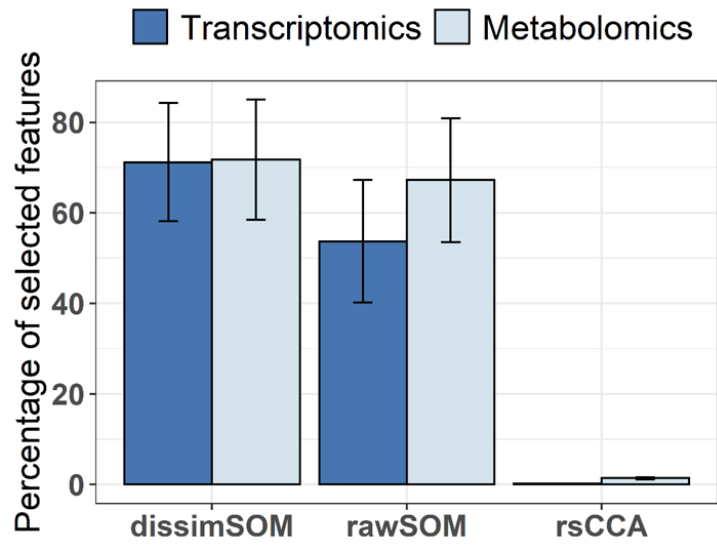

**Figure S3.** Average percentage of features selected by SOM (dissimilarity kernel-based and raw) and Robust Sparse CCA methods for transcriptomic (middle blue bars) and metabolomic (light blue bars) blocks. One hundred Monte Carlo simulations.
